# Supplementary material
Source: publisher site journal article supplement (https://www.dovepress.com/article/586407)
Supplement: Supplementary file 1 [file 586407%20Supplementary%20Material.pdf]

**Supplementary Table 1. Antibody staining conditions for immunohistochemistry**

| Marker            | Antigen retrieval          | Blocking | Primary antibody                                          |               |                        | Secondary antibody                                        |               |
|-------------------|----------------------------|----------|-----------------------------------------------------------|---------------|------------------------|-----------------------------------------------------------|---------------|
|                   |                            |          | Antibody                                                  | Diluted in    | Incubation temperature | Antibody                                                  | Diluted in    |
| Pan-CK            | Sodium-citrate (pH = 6.00) | -        | 1:3200, monoclonal mouse, PCK-26 Sigma-Aldrich            | 1% BSA in PBS | Room temperature       | Biotinylated anti-mouse (1:200, polyclonal goat, abcam)   | 1% BSA in PBS |
| Ki67              | Sodium-citrate (pH = 6.00) | Teng-T   | 1:300, monoclonal rabbit, SP6, Abcam                      | 1% BSA in PBS | 4°C                    | Biotinylated anti-rabbit (1:1000, polyclonal goat, abcam) | 1% BSA in PBS |
| Cleaved-caspase 3 | Sodium-citrate (pH = 6.00) | -        | 1:300, monoclonal rabbit, D175, Cell Signaling Technology | 1% BSA in PBS | Room temperature       | Biotinylated anti-rabbit (1:1000, polyclonal goat, abcam) | 1% BSA in PBS |
| HER2              | Sodium-citrate (pH = 6.00) | -        | 1:100, polyclonal rabbit, Dako                            | 1% BSA in PBS | Room temperature       | Biotinylated anti-rabbit (1:1000, polyclonal goat, abcam) | 1% BSA in PBS |
| Endoglin          | Sodium-citrate (pH = 6.00) | -        | 1:400, Baf1097, polyclonal goat, R&D                      | 1% BSA in PBS | Room temperature       | Biotinylated anti-goat (1:200, polyclonal)                | 1% BSA in PBS |

|          |                               |   |                                                                              |                  |                     |                                                                          |                  |
|----------|-------------------------------|---|------------------------------------------------------------------------------|------------------|---------------------|--------------------------------------------------------------------------|------------------|
|          |                               |   |                                                                              |                  |                     | Rabbit,<br>Dako)                                                         |                  |
| Vimentin | Sodium-citrate<br>(pH = 6.00) | - | 1:400,<br>D21H3,<br>monoclonal<br>rabbit,<br>Cell<br>Signaling<br>Technology | 1% BSA<br>in PBS | Room<br>temperature | Biotinylated<br>anti-rabbit<br>(1:1000,<br>polyclonal<br>goat,<br>abcam) | 1% BSA<br>in PBS |
| aSMA     | Sodium-citrate<br>(pH = 6.00) | - | 1:1600,<br>Progen                                                            | 1% BSA<br>in PBS | Room<br>temperature | Biotinylated<br>anti-mouse<br>(1:200,<br>polyclonal<br>goat,<br>abcam)   | 1% BSA<br>in PBS |

**Abbreviations:** PCK: pan-cytokeratin, BSA: bovine-serum albumin, PBS: phosphate-buffered saline,

HRP: horseradish peroxidase, HER2: human epidermal growth factor receptor 2

# Supplementary figure 1

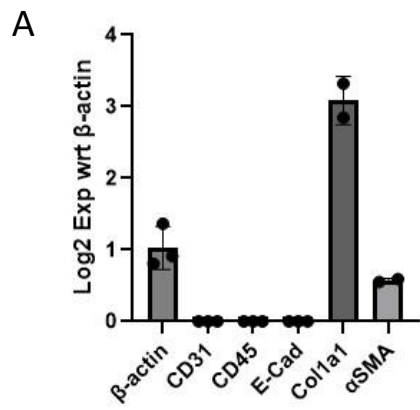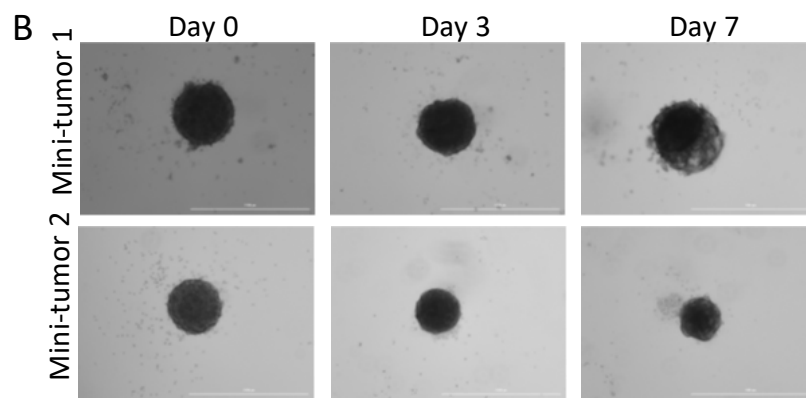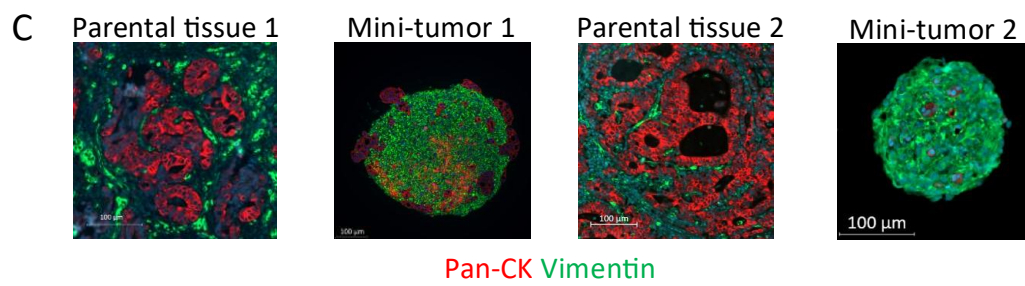

## Supplementary figure 2

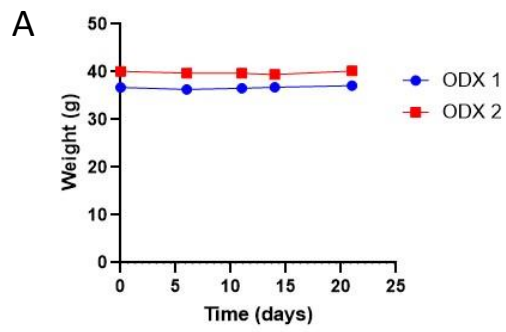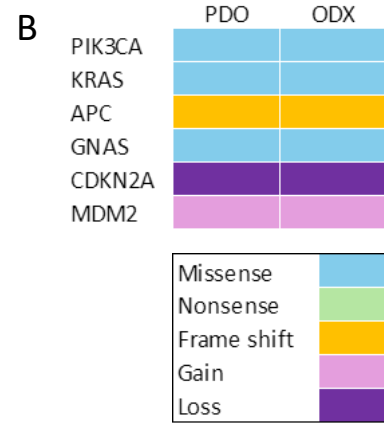

### Supplementary figure 3

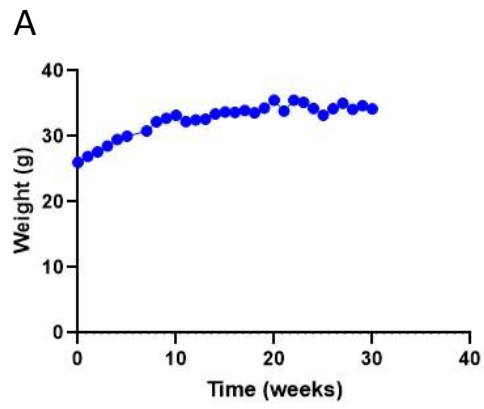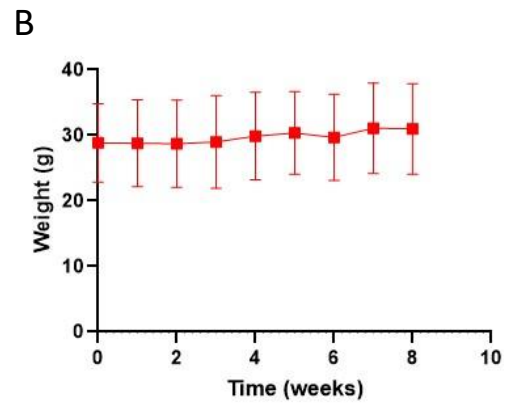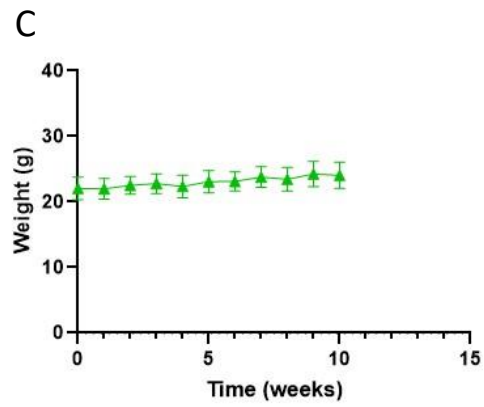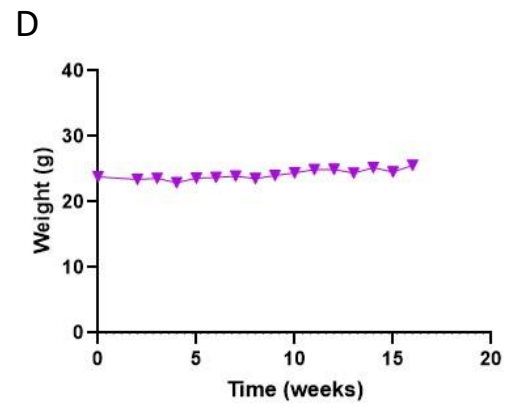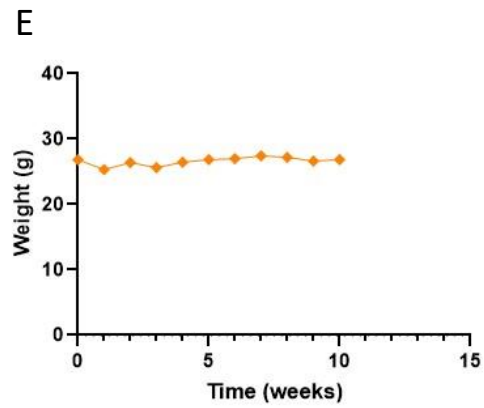

## Supplementary figure 4

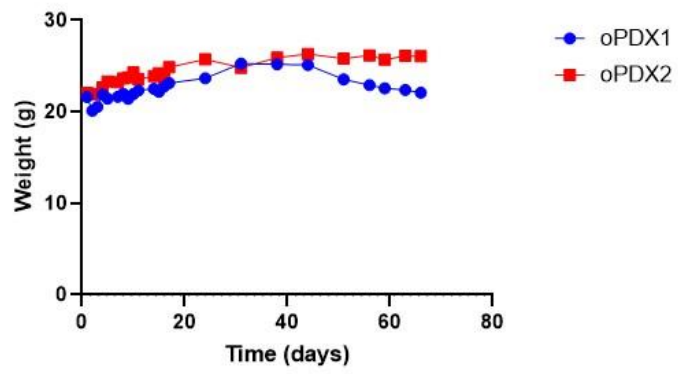

## Supplementary figure legends

### **Supplementary Figure 1 GC mini-tumors.**

A) Expression of epithelial, immune and stromal markers of the used fibroblasts. B) GC-mini-tumor structures over the span of 7 days. Scale bar represents 1000  $\mu\text{m}$ . C) Immunofluorescent stainings for Pan-CK and vimentin of mini-tumors and their parental tissue. Scale bar represents 100  $\mu\text{m}$ .

### **Supplementary Figure 2 Subcutaneous injection of GC-PDOs.**

A) Mouse weights after subcutaneous injection of GC-PDOs (n=2). B) Mutational spectrum of GC-ODX material compared to GC-PDOs.

### **Supplementary Figure 3 Weights of mice with subcutaneous engrafted GC fragments.**

Weights of mice receiving A) G0 (n=1), B) G1 (n=2), C) G2 (n=3), D) G1 (frozen) (n=1) and E) G2 (frozen) (n=1) material.

### **Supplementary Figure 4 Mouse weight after orthotopic engraftment of GC tumors.**

Weight was monitored over the span of the experiment
